# Supplementary material for: Large-Scale Reassessment of In-Vineyard Smoke-Taint Grapevine Protection Strategies and the Development of Predictive Off-Vine Models
Source: MDPI journal article supplement (doi:10.3390/molecules26144311), 2021-07-16
Supplement: s1 [file s1]

# Large-scale reassessment of in-vineyard smoke-taint grapevine protection strategies and the development of predictive off-vine models

James W Favell<sup>1,▲</sup>, Osei B Fordwour<sup>1</sup>, Sydney C Morgan<sup>2,•</sup>, Ieva Zigg<sup>1</sup>, and Wesley F Zandberg<sup>1,\*</sup>

<sup>1</sup> The University of British Columbia, Department of Chemistry, 3247 University Way, Kelowna, BC, Canada;

<sup>2</sup> The University of British Columbia, Department of Biology, 1177 Research Road, Kelowna, BC, Canada;

Current addresses:

▲ University of Alberta, Department of Chemistry, 11227 Saskatchewan Drive, Edmonton, AB, Canada, T6G 2G2

• Sanford Consortium for Regenerative Medicine, University of California, San Diego, 2880 Torrey Pines Scenic Drive, La Jolla, CA, USA, 92037

\* Correspondence: [wesley.zandberg@ubc.ca](mailto:wesley.zandberg@ubc.ca) ; Tel.: +1-250-807-9821

## Supplementary Materials.

|                                                                                                                                |    |
|--------------------------------------------------------------------------------------------------------------------------------|----|
| <b>Contents</b> .....                                                                                                          | 1  |
| <b>Table S1.</b> Evaluation of three agro-sprays' ability to influence the adhesiveness of VPs to table grapes.....            | 2  |
| <b>Table S2.</b> Evaluation of the impact of washing grapes on VP levels.....                                                  | 2  |
| <b>Table S3.</b> Concentrations of free and total VPs in table grapes processed 1 and 24 h post-smoke.....                     | 3  |
| <b>Table S4.</b> Vineyard 1: Free VP concentrations at T <sub>1</sub> and T <sub>2</sub> .....                                 | 4  |
| <b>Table S5.</b> Vineyard 1: Total ( <i>i.e.</i> acid hydrolysis) VP concentrations at T <sub>1</sub> and T <sub>2</sub> ..... | 5  |
| <b>Table S6.</b> Vineyard 2: Free VP concentrations at T <sub>1</sub> and T <sub>2</sub> .....                                 | 6  |
| <b>Table S7.</b> Vineyard 2: Total ( <i>i.e.</i> acid hydrolysis) VP concentrations at T <sub>1</sub> and T <sub>2</sub> ..... | 7  |
| <b>Table S8.</b> Vineyard 3: Free VP concentrations at T <sub>1</sub> and T <sub>2</sub> .....                                 | 8  |
| <b>Table S9.</b> Vineyard 4: Total ( <i>i.e.</i> acid hydrolysis) VP concentrations at T <sub>1</sub> and T <sub>2</sub> ..... | 9  |
| <b>Table S10.</b> Meteorological data collected for the vineyards used in biofilm field studies.....                           | 10 |
| <b>Table S11.</b> Chemical composition of must and wines.....                                                                  | 11 |
| <b>Table S12.</b> Concentration of free VPs in must and wine samples.....                                                      | 12 |
| <b>Table S13.</b> Concentration of total ( <i>i.e.</i> acid hydrolysis) VPs in must and wine samples.....                      | 13 |
| <b>Figure S1.</b> Extracted ion chromatograms for all VPs quantitated.....                                                     | 14 |

**Table S1.** Evaluation of three agro-sprays' ability to influence the adhesiveness of VPs to table grapes.

| smoke | treatment <sup>(1)</sup> | free | concentration (mean $\pm$ SEM) of volatile phenols (ng / g) |                      |                                   |                     |                    |                      |                    |                  |                    |
|-------|--------------------------|------|-------------------------------------------------------------|----------------------|-----------------------------------|---------------------|--------------------|----------------------|--------------------|------------------|--------------------|
|       |                          |      | phenol <sup>(2),(3)</sup>                                   | <i>o</i> -cresol     | <i>p/m</i> -cresol <sup>(4)</sup> | guaiacol            | 4-ethylphenol      | 4-methylguaiacol     | 4-ethylguaiacol    | syringol         | eugenol            |
| -     | control                  | -    | 5.2 $\pm$ 0.21                                              |                      |                                   |                     |                    |                      |                    |                  |                    |
| +     | control                  | -    | 291.25 $\pm$ 32.34a                                         | 47.75 $\pm$ 5.95a    | 135.08 $\pm$ 10.31a               | 157.59 $\pm$ 17.92a | 12.41 $\pm$ 1.29a  | 112.62 $\pm$ 14.92a  | 17.31 $\pm$ 4.14a  |                  | 9.69 $\pm$ 2.36a   |
| -     | biofilm                  | -    | 5.46 $\pm$ 0.46                                             |                      |                                   |                     |                    |                      |                    |                  |                    |
| +     | biofilm                  | -    | 851.42 $\pm$ 22.22b                                         | 157.71 $\pm$ 4.06c   | 395.99 $\pm$ 37.31b               | 554.17 $\pm$ 18.28b | 32.65 $\pm$ 6.83a  | 475 $\pm$ 8.25c      | 76.43 $\pm$ 1.79b  | 4.05 $\pm$ 0.46a | 34.46 $\pm$ 1.83b  |
| -     | oil 1                    | -    | 5.02 $\pm$ 0.27                                             |                      | 1.07 $\pm$ 0.04                   |                     |                    |                      |                    |                  |                    |
| +     | oil 1                    | -    | 479.4 $\pm$ 79.64a                                          | 90.47 $\pm$ 12.67b   | 188.18 $\pm$ 38.85a               | 274.52 $\pm$ 43.4a  | 15.44 $\pm$ 4.38a  | 228.64 $\pm$ 40.6b   | 34.9 $\pm$ 8.37a   | 2.17 $\pm$ 0.31a | 17.72 $\pm$ 4.23a  |
| -     | oil 2                    | -    | 3.34 $\pm$ 0.45                                             |                      |                                   |                     |                    |                      |                    |                  |                    |
| +     | oil 2                    | -    | 433.83 $\pm$ 31.89a                                         | 85.53 $\pm$ 3.89b    | 184.28 $\pm$ 25.09a               | 255.43 $\pm$ 16.04a | 15.61 $\pm$ 4.74a  | 223.01 $\pm$ 15.03ab | 37.84 $\pm$ 4.4a   | 1.59 $\pm$ 0.58a | 17.83 $\pm$ 1.94a  |
|       | S x T                    |      | ****                                                        | n.a.                 | n.a.                              | n.a.                | n.a.               | n.a.                 | n.a.               | n.a.             | n.a.               |
|       | smoke (S)                |      | ****                                                        | n.a.                 | n.a.                              | n.a.                | n.a.               | n.a.                 | n.a.               | n.a.             | n.a.               |
|       | treatment (T)            |      | ****                                                        | n.a.                 | n.a.                              | n.a.                | n.a.               | n.a.                 | n.a.               | n.a.             | n.a.               |
| smoke | treatment                | acid | phenol                                                      | <i>o</i> -cresol     | <i>p-m</i> -cresol                | guaiacol            | 4-ethylphenol      | 4-methylguaiacol     | 4-ethylguaiacol    | syringol         | eugenol            |
| -     | control                  | +    | 3.63 $\pm$ 0.65                                             | 2.74 $\pm$ 0.18      | 2.03 $\pm$ 0.11                   | 1.13                | 3.17 $\pm$ 0.58    |                      |                    |                  | 5.69 $\pm$ 1.49    |
| +     | control                  | +    | 330.15 $\pm$ 49.87a                                         | 79.09 $\pm$ 14.6a    | 133.19 $\pm$ 14.68a               | 184.69 $\pm$ 13.75a | 36.97 $\pm$ 10.17a | 121.25 $\pm$ 12.59a  | 25 $\pm$ 4.75a     |                  | 23.38 $\pm$ 4.25a  |
| -     | biofilm                  | +    | 10.78 $\pm$ 0.37                                            |                      | 2.68 $\pm$ 0.1                    | 1.89 $\pm$ 0.17     | 6.24 $\pm$ 0.7     |                      | 1.44 $\pm$ 0.19    |                  | 7.61 $\pm$ 0.38    |
| +     | biofilm                  | +    | 809.27 $\pm$ 27.77b                                         | 273.81 $\pm$ 19.36b  | 354.84 $\pm$ 20.97b               | 563.87 $\pm$ 27.36b | 88.33 $\pm$ 15.52a | 441.31 $\pm$ 30.4b   | 98.03 $\pm$ 1.78b  | 7.23 $\pm$ 0a    | 65.29 $\pm$ 1.42b  |
| -     | oil 1                    | +    | 15.59 $\pm$ 1.75                                            | 1.75 $\pm$ 0         | 3.66 $\pm$ 0.21                   | 1.79 $\pm$ 0.13     | 6.96 $\pm$ 0.8     |                      | 1.86 $\pm$ 0.17    |                  | 7.62 $\pm$ 2.27    |
| +     | oil 1                    | +    | 436.84 $\pm$ 91.02a                                         | 134.83 $\pm$ 23.84a  | 172.63 $\pm$ 34.11a               | 270.37 $\pm$ 40.15a | 40.99 $\pm$ 10.17a | 212.19 $\pm$ 33.5a   | 43.99 $\pm$ 10.56a | 3.61 $\pm$ 0.76a | 36.69 $\pm$ 7.64a  |
| -     | oil 2                    | +    | 22.15 $\pm$ 3.36                                            | 3.11 $\pm$ 0         | 22 $\pm$ 1.76                     | 1.66 $\pm$ 0.19     | 16.64 $\pm$ 5.47   |                      | 3.04 $\pm$ 0.44    |                  | 12.45 $\pm$ 2.02   |
| +     | oil 2                    | +    | 539.43 $\pm$ 95.65ab                                        | 179.54 $\pm$ 23.86ab | 1.13 $\pm$ 0ab                    | 234.91 $\pm$ 17.68a | 79.27 $\pm$ 16.44a | 172.75 $\pm$ 11.6a   | 53.45 $\pm$ 6.69a  | 3.66 $\pm$ 0.54a | 42.32 $\pm$ 5.59ab |
|       | S x T                    | **   | -                                                           | -                    | ****                              | ****                | ns                 | -                    | -                  | -                | ***                |
|       | smoke (S)                | **** | -                                                           | -                    | ****                              | ****                | ****               | -                    | -                  | -                | ****               |
|       | treatment (T)            | **   | -                                                           | -                    | ****                              | ****                | *                  | -                    | -                  | -                | ***                |

**Notes:** <sup>(1)</sup>All treatments are labelled identically to our previous research on the same products. Oil 1 and 2 are briefly described in the materials and methods; further details may be obtained in Favell *et al.* (2019). <sup>(2)</sup>All averages are reported  $\pm$  the standard error of the mean of a maximum of three replicates; a pooled sample made from one unique cluster of grapes was considered to be a replicate. No zeros were imputed and blanks indicate that VP was below the method detection limit (MDL) for all three replicates of a particular treatment. Different letters (within columns) indicate a statistically significant difference between means of only the smoked samples for each VP as assessed using a one-way ANOVA followed by a Tukey HSD *post hoc* test ( $P < 0.05$ ). A two-way ANOVA was used to evaluate the interaction between smoke (S) and treatment (T); \*, \*\*, \*\*\* and \*\*\*\* denote significant differences at  $p \leq 0.05$ ,  $p \leq 0.01$ ,  $p \leq 0.001$  and  $p \leq 0.0001$ , respectively; n.s. = not significant; n.a. = not applicable (due to insufficient replicates). <sup>(4)</sup>*p*- and *m*-cresol were unresolvable by the GC-MS/MS conditions employed and the sum of these VPs is reported.

**Table S2.** Evaluation of the impact of washing grapes on VP concentrations<sup>(1)</sup>.

| smoke | treatment | wash <sup>(2)</sup> | concentration (mean ± SEM) of volatile phenols (ng / g) |                  |                    |                 |                |                  |                 |               |               |
|-------|-----------|---------------------|---------------------------------------------------------|------------------|--------------------|-----------------|----------------|------------------|-----------------|---------------|---------------|
|       |           |                     | phenol                                                  | <i>o</i> -cresol | <i>p/m</i> -cresol | guaiacol        | 4-ethylphenol  | 4-methylguaiacol | 4-ethylguaiacol | syringol      | eugenol       |
| +     | control   | -                   | 291.2 ± 32.34                                           | 47.7 ± 5.95      | 135.1 ± 10.31      | 157.6 ± 17.92   | 12.4 ± 1.29    | 112.6 ± 14.92    | 17.3 ± 4.14     |               | 9.7 ± 2.36    |
| +     | control   | +                   | 191.7 ± 21.87****                                       | 31.5 ± 2.81ns    | 91.7 ± 9.87ns      | 95.3 ± 8.01**   | 8.2 ± 1.31ns   | 66.9 ± 6.32ns    | 8.8 ± 1.32ns    |               | 4.1 ± 0.77ns  |
| +     | biofilm   | -                   | 851.4 ± 22.22                                           | 157.7 ± 4.06     | 396.0 ± 37.31      | 554.2 ± 18.28   | 32.6 ± 6.83    | 475.0 ± 8.25     | 76.4 ± 1.79     | 4.1 ± 0.46    | 34.5 ± 1.83   |
| +     | biofilm   | +                   | 911.8 ± 65.23ns                                         | 162.5 ± 15.57ns  | 458.5 ± 40.68ns    | 568.3 ± 53.69ns | 46.8 ± 13.75ns | 482.8 ± 55.68 ns | 81.0 ± 12.98 ns | 5.7 ± 0.72 ns | 37.8 ± 7.78ns |

**Notes:** <sup>(1)</sup>Only concentrations of free VPs were recorded. <sup>(2)</sup> + denotes samples that were washed under cold water for 30 s before processing and VP extraction. The impact of washing was evaluated using an unpaired t-test with the Holm-Sidak method to check for significance; \*, \*\*, \*\*\* and \*\*\*\* denote significant differences at  $p \leq 0.05$ ,  $p \leq 0.01$ ,  $p \leq 0.001$  and  $p \leq 0.0001$ , respectively; ns = not significant.

**Table S3.** Concentrations of free and total (*i.e.* acid-labile plus free) VPs in grapes processed 1 and 24 h after smoke-exposure.

| hour <sup>(1)</sup> | treatment | acid | concentration (mean $\pm$ SEM) of volatile phenols (ng / g)               |                      |                      |                      |                      |                      |                     |                    |
|---------------------|-----------|------|---------------------------------------------------------------------------|----------------------|----------------------|----------------------|----------------------|----------------------|---------------------|--------------------|
|                     |           |      | phenol                                                                    | <i>o</i> -cresol     | <i>p/m</i> -cresol   | guaiacol             | 4-ethylphenol        | 4-methylguaiacol     | 4-ethylguaiacol     | eugenol            |
|                     | smoke     |      |                                                                           |                      |                      |                      |                      |                      |                     |                    |
| 1                   | control   | -    | 291.2 $\pm$ 32.34                                                         | 47.7 $\pm$ 5.95      | 135.1 $\pm$ 10.31    | 157.6 $\pm$ 17.92    | 12.4 $\pm$ 1.29      | 112.6 $\pm$ 14.92    | 17.3 $\pm$ 4.14     | 9.7 $\pm$ 2.36     |
| 24                  | control   | -    | 42.0 $\pm$ 15.20**                                                        | 2.5 $\pm$ 0.28**     | 12.7 $\pm$ 1.61***   | 2.5 $\pm$ 0.71**     | 1.3 ns               | 1.8 $\pm$ 0.33**     |                     | 1.3 ns             |
| 1                   | control   | +    | 330.2 $\pm$ 49.87                                                         | 79.1 $\pm$ 14.60     | 133.2 $\pm$ 14.68    | 184.7 $\pm$ 13.75    | 37.0 $\pm$ 10.17     | 121.3 $\pm$ 12.59    | 25.0 $\pm$ 4.75     | 23.4 $\pm$ 4.25    |
| 24                  | control   | +    | 292.0 $\pm$ 53.44 ns                                                      | 63.3 $\pm$ 17.94 ns  | 127.2 $\pm$ 32.27 ns | 114.9 $\pm$ 13.60 ns | 42.5 $\pm$ 18.65 ns  | 56.9 $\pm$ 11.65 ns  | 9.4 $\pm$ 1.54 ns   | 15.2 $\pm$ 4.91 ns |
| 1                   | biofilm   | -    | 851.4 $\pm$ 22.22                                                         | 157.7 $\pm$ 4.06     | 396.0 $\pm$ 37.31    | 554.2 $\pm$ 18.28    | 32.6 $\pm$ 6.83      | 475.0 $\pm$ 8.25     | 76.4 $\pm$ 1.79     | 4.1 $\pm$ 0.46     |
| 24                  | biofilm   | -    | 381.2 $\pm$ 27.20***                                                      | 16.1 $\pm$ 2.06****  | 96.3 $\pm$ 16.47**   | 20.8 $\pm$ 2.86****  | 9.4 $\pm$ 1.40*      | 17.4 $\pm$ 3.12****  | 3.1 $\pm$ 0.63****  | 2.2 $\pm$ 0.49**** |
| 1                   | biofilm   | +    | 809.3 $\pm$ 27.77                                                         | 273.8 $\pm$ 19.36    | 354.8 $\pm$ 20.97    | 563.9 $\pm$ 27.36    | 88.3 $\pm$ 15.52     | 441.3 $\pm$ 30.40    | 98.0 $\pm$ 1.78     | 7.2                |
| 24                  | biofilm   | +    | 801.3 $\pm$ 81.56 ns                                                      | 254.7 $\pm$ 57.74 ns | 411.8 $\pm$ 39.08 ns | 504.2 $\pm$ 43.32 ns | 136.0 $\pm$ 30.04 ns | 343.7 $\pm$ 45.15 ns | 56.1 $\pm$ 1.37**** | 8.7 $\pm$ 0.37     |
|                     | smoke     |      |                                                                           |                      |                      |                      |                      |                      |                     |                    |
|                     |           |      | relative concentrations (mean $\pm$ SEM) of volatile phenols (% of total) |                      |                      |                      |                      |                      |                     |                    |
| 1                   | control   | -    | 37.2 $\pm$ 0.10                                                           | 6.1 $\pm$ 0.14       | 17.2 $\pm$ 1.05      | 20.1 $\pm$ 0.23      | 1.6 $\pm$ 0.15       | 14.4 $\pm$ 0.60      | 2.2 $\pm$ 0.31      | 1.2 $\pm$ 0.18     |
| 24                  | control   | -    | 65.6 $\pm$ 12.15                                                          | 3.8 $\pm$ 0.75       | 19.8 $\pm$ 8.85      | 3.9 $\pm$ 0.49       | 2.0                  | 2.8 $\pm$ 0.39       |                     | 2.0                |
| 1                   | control   | +    | 35.4 $\pm$ 0.86                                                           | 8.5 $\pm$ 0.50       | 14.3 $\pm$ 0.39      | 19.8 $\pm$ 1.37      | 4.0 $\pm$ 0.64       | 13.0 $\pm$ 0.40      | 2.7 $\pm$ 0.17      | 2.5 $\pm$ 0.17     |
| 24                  | control   | +    | 40.5 $\pm$ 1.46                                                           | 8.8 $\pm$ 0.98       | 17.6 $\pm$ 1.54      | 15.9 $\pm$ 3.31      | 5.9 $\pm$ 1.50       | 7.9 $\pm$ 1.99       | 1.3 $\pm$ 0.19      | 2.1 $\pm$ 0.33     |
| 1                   | biofilm   | -    | 33.0 $\pm$ 0.08                                                           | 6.1 $\pm$ 0.88       | 15.3 $\pm$ 0.16      | 21.5 $\pm$ 0.22      | 1.3 $\pm$ 0.46       | 18.4 $\pm$ 0.07      | 3.0 $\pm$ 0.01      | 0.2 $\pm$ 0.06     |
| 24                  | biofilm   | -    | 69.8 $\pm$ 1.99                                                           | 2.9 $\pm$ 0.11       | 17.6 $\pm$ 1.77      | 3.8 $\pm$ 0.20       | 1.7 $\pm$ 0.15       | 3.2 $\pm$ 0.30       | 0.6 $\pm$ 0.07      | 0.4 $\pm$ 0.06     |
| 1                   | biofilm   | +    | 30.0 $\pm$ 0.77                                                           | 10.1 $\pm$ 0.64      | 13.1 $\pm$ 0.58      | 20.9 $\pm$ 1.13      | 3.3 $\pm$ 0.55       | 16.3 $\pm$ 1.20      | 3.6 $\pm$ 0.07      | 0.3 $\pm$ 0.09     |
| 24                  | biofilm   | +    | 31.3 $\pm$ 1.69                                                           | 10.0 $\pm$ 1.75      | 16.1 $\pm$ 0.87      | 19.7 $\pm$ 2.64      | 5.3 $\pm$ 0.95       | 13.4 $\pm$ 2.39      | 2.2 $\pm$ 0.08      | 0.3 $\pm$ 0.02     |
|                     | no smoke  |      |                                                                           |                      |                      |                      |                      |                      |                     |                    |
|                     |           |      | relative concentrations (mean $\pm$ SEM) of volatile phenols (% of total) |                      |                      |                      |                      |                      |                     |                    |
| 1                   | control   | -    | 100.0 $\pm$ 0.00                                                          |                      |                      |                      |                      |                      |                     |                    |
| 1                   | control   | +    | 19.7 $\pm$ 0.65                                                           | 14.9 $\pm$ 0.65      | 11.0 $\pm$ 0.11      | 6.1                  | 17.2 $\pm$ 0.58      |                      |                     | 31.0 $\pm$ 1.42    |

**Notes:** <sup>(1)</sup>Hours post-smoke exposure. The difference in the VP presence over time was also evaluated by **unpaired t-test and the Holm-Sidak method**; \*, \*\*, \*\*\* and \*\*\*\* denote significant differences at  $p \leq 0.05$ ,  $p \leq 0.01$ ,  $p \leq 0.001$  and  $p \leq 0.0001$ , respectively; ns = not significant.

**Table S4.** Vineyard 1: Free VP concentrations immediately after (T<sub>1</sub>) smoke-exposure and at harvest (T<sub>2</sub>).<sup>(1)(2)(3)</sup>

| VP                                                 | smoke | biofilm application: days before smoke exposure |                |                |               | S x T | smoke (S) | treatment (T) |
|----------------------------------------------------|-------|-------------------------------------------------|----------------|----------------|---------------|-------|-----------|---------------|
|                                                    |       | control                                         | 1              | 7              | 14            |       |           |               |
| time: 1 hour post-smoke exposure (T <sub>1</sub> ) |       |                                                 |                |                |               |       |           |               |
| syringol                                           | -     |                                                 |                |                |               |       |           |               |
| syringol                                           | +     |                                                 |                |                |               |       |           |               |
| phenol                                             | -     | 2.1 ± 0.51                                      | 1.38 ± 0.48    | 1.54 ± 0.24    | 1.44 ± 0.16   | ns    | ***       | ns            |
| phenol                                             | +     | 4.22 ± 1.66a                                    | 10.58 ± 2.87a  | 7.56 ± 2.53a   | 7.35 ± 2.47a  |       |           |               |
| <i>p/m</i> -cresol                                 | -     | 0.46 ± 0.12                                     | 0.3 ± 0.16     | 0.28 ± 0.12    | 0.25 ± 0.18   | **    | ****      | **            |
| <i>p/m</i> -cresol                                 | +     | 1.69 ± 0.51a                                    | 7.98 ± 1.38ab  | 5.11 ± 0.79ab  | 4.43 ± 0.74b  |       |           |               |
| <i>o</i> -cresol                                   | -     | 1.31 ± 0.38                                     | 1.29 ± 0.13    | 1.47 ± 0.17    | 1.23 ± 0.32   | **    | ****      | **            |
| <i>o</i> -cresol                                   | +     | 4.81 ± 1.15a                                    | 18.08 ± 3ab    | 12.24 ± 1.75ab | 10.06 ± 2.02b |       |           |               |
| guaiaicol                                          | -     |                                                 |                |                |               |       |           |               |
| guaiaicol                                          | +     | 3.91 ± 1.71a                                    | 25.15 ± 6.25ab | 14.96 ± 4.1ab  | 10.27 ± 1.87b |       |           |               |
| eugenol                                            | -     | 0.58 ± 0.41                                     | 0.74 ± 0.16    | 1.23 ± 0.7     | 1.21 ± 0.31   | ns    | ns        | ns            |
| eugenol                                            | +     | 1.07 ± 0.19a                                    | 1.6 ± 0.5a     | 0.98 ± 0.13a   | 1.18 ± 0.21a  |       |           |               |
| 4-methylguaiaicol                                  | -     | 0.53 ± 0                                        | 0.1 ± 0        |                |               |       |           |               |
| 4-methylguaiaicol                                  | +     | 1.06 ± 0.42a                                    | 12.07 ± 2.94a  | 5.78 ± 1.09ab  | 4.12 ± 0.65b  |       |           |               |
| 4-ethylphenol                                      | -     | 0.27 ± 0.01                                     | 0.25 ± 0.04    | 0.27 ± 0.03    | 0.24 ± 0.02   | *     | ****      | *             |
| 4-ethylphenol                                      | +     | 0.44 ± 0.03a                                    | 0.83 ± 0.12ab  | 0.65 ± 0.05ab  | 0.63 ± 0.07b  |       |           |               |
| 4-ethylguaiaicol                                   | -     |                                                 |                |                |               |       |           |               |
| 4-ethylguaiaicol                                   | +     |                                                 |                |                |               |       |           |               |
| time: harvest (T <sub>2</sub> )                    |       |                                                 |                |                |               |       |           |               |
| syringol                                           | -     |                                                 |                |                |               |       |           |               |
| syringol                                           | +     | 0.31 ± 0.03a                                    | 0.27 ± 0.02a   | 0.29 ± 0.05a   | 0.26 ± 0.01a  |       |           |               |
| phenol                                             | -     | 11.32 ± 0.91                                    | 13.28 ± 0.65   | 13.14 ± 0.86   | 13.36 ± 0.49  | ns    | ****      | ns            |
| phenol                                             | +     | 34.42 ± 9.92a                                   | 83.91 ± 15.78a | 53.73 ± 16.38a | 55.96 ± 9.22a |       |           |               |
| <i>p/m</i> -cresol                                 | -     | 1.44 ± 0.11                                     | 1.85 ± 0.15    | 1.99 ± 0.09    | 1.71 ± 0.07   | **    | ****      | **            |
| <i>p/m</i> -cresol                                 | +     | 4.93 ± 1.17a                                    | 11.17 ± 1.34ab | 7.55 ± 1.64b   | 11.05 ± 1.07b |       |           |               |
| <i>o</i> -cresol                                   | -     | 5.97 ± 1.09                                     | 3.57 ± 0.3     | 5.14 ± 1.27    | 4.33 ± 0.29   | ns    | ****      | ns            |
| <i>o</i> -cresol                                   | +     | 11.43 ± 3.28a                                   | 18.09 ± 1.98a  | 12.75 ± 2.6a   | 16.99 ± 1.86a |       |           |               |
| guaiaicol                                          | -     | 1.04 ± 0.03                                     | 1.3 ± 0.08     | 1.31 ± 0.04    | 1.15 ± 0.04   | *     | ****      | *             |
| guaiaicol                                          | +     | 6.92 ± 2.5a                                     | 20.41 ± 4.11ab | 11.68 ± 2.17ab | 13.57 ± 1.54b |       |           |               |
| eugenol                                            | -     | 0.15 ± 0                                        | 0.41 ± 0.06    | 0.75 ± 0.62    | 0.37 ± 0.11   | ns    | ***       | ns            |
| eugenol                                            | +     | 0.85 ± 0.1a                                     | 1.17 ± 0.18a   | 0.92 ± 0.11a   | 1.44 ± 0.25a  |       |           |               |
| 4-methylguaiaicol                                  | -     | 0.4 ± 0.02                                      | 0.42 ± 0.01    | 0.43 ± 0.02    | 0.41 ± 0.01   | **    | ****      | **            |
| 4-methylguaiaicol                                  | +     | 1.36 ± 0.39a                                    | 5.2 ± 1.14ab   | 2.93 ± 0.35ab  | 3.4 ± 0.37b   |       |           |               |
| 4-ethylphenol                                      | -     | 1.39 ± 0.07                                     | 1.44 ± 0.06    | 1.59 ± 0.07    | 1.56 ± 0.04   | ns    | ****      | *             |
| 4-ethylphenol                                      | +     | 1.89 ± 0.07a                                    | 2.06 ± 0.1a    | 2.1 ± 0.17a    | 2.2 ± 0.09a   |       |           |               |
| 4-ethylguaiaicol                                   | -     | 0.19 ± 0.01                                     | 0.2 ± 0        | 0.19 ± 0       | 0.2 ± 0.02    | **    | ****      | **            |
| 4-ethylguaiaicol                                   | +     | 0.25 ± 0.02a                                    | 0.58 ± 0.11ab  | 0.36 ± 0.02ab  | 0.49 ± 0.05b  |       |           |               |

**Notes:** <sup>(1)</sup> Mean VP concentrations ( $n = 4$ ) are recorded in ng/g ± the standard error of the mean (SEM). <sup>(2)</sup> The effects of smoke (S), biofilm treatments (T) and S x T interaction were tested with a two-way ANOVA; \*, \*\*, \*\*\* and \*\*\*\* denote significant differences of  $p \leq 0.05$ ,  $p \leq 0.01$ ,  $p \leq 0.001$  and  $p \leq 0.0001$ , respectively; ns = not significant ( $p \geq 0.05$ ). <sup>(3)</sup> Different letters (within the rows) indicate the differences in effects of time of biofilm application on the smoked sample only using one-way ANOVA followed by a Tukey's HSD test. Blank cells denote concentrations below the method limit of detection.

**Table S5.** Vineyard 1: Total (*i.e.* quantitated after acid hydrolysis) VP concentrations immediately after (T<sub>1</sub>) smoke-exposure and at harvest (T<sub>2</sub>).<sup>(1)(2)</sup>

| VP                              | smoke | biofilm application: days before smoke exposure    |                 |                |                | S x T | smoke (S) | treatment (T) |
|---------------------------------|-------|----------------------------------------------------|-----------------|----------------|----------------|-------|-----------|---------------|
|                                 |       | control                                            | 1               | 7              | 14             |       |           |               |
|                                 |       | time: 1 hour post-smoke exposure (T <sub>1</sub> ) |                 |                |                |       |           |               |
| syringol                        | -     | 13.17 ± 1.98                                       | 18.21 ± 3.26    | 11.74 ± 1.77   | 11.34 ± 1.27   | ns    | ns        | ns            |
| syringol                        | +     | 19.64 ± 1.88a                                      | 17.99 ± 3.77a   | 18.21 ± 1.52a  | 11.46 ± 2.34a  |       |           |               |
| phenol                          | -     | 23.78 ± 2.56                                       | 24.25 ± 4.54    | 21.73 ± 2.3    | 18.52 ± 1.82   | ns    | ****      | *             |
| phenol                          | +     | 42.7 ± 8.99a                                       | 70.59 ± 7.68a   | 49.29 ± 10.1a  | 36.48 ± 9.53a  |       |           |               |
| <i>p/m</i> -cresol              | -     | 4.96 ± 1.3                                         | 5.72 ± 0.86     | 5.88 ± 0.39    | 5.47 ± 0.45    | *     | ****      | **            |
| <i>p/m</i> -cresol              | +     | 10.52 ± 1.22a                                      | 20.61 ± 2.05a   | 17.24 ± 2.87a  | 10.47 ± 2.73a  |       |           |               |
| <i>o</i> -cresol                | -     | 13.96 ± 5.54                                       | 15.57 ± 3.52    | 13.98 ± 1.14   | 16.2 ± 2.33    | ns    | ****      | ns            |
| <i>o</i> -cresol                | +     | 31.99 ± 3.84a                                      | 48.15 ± 7.57a   | 45.03 ± 8.75a  | 28.48 ± 5.65a  |       |           |               |
| guaiaicol                       | -     | 4.19 ± 0.53                                        | 3.08 ± 0.47     | 2.99 ± 0.31    | 2.66 ± 0.14    | **    | ****      | *             |
| guaiaicol                       | +     | 12.1 ± 2.84ab                                      | 29.24 ± 4.35a   | 24.31 ± 4.39ab | 13.97 ± 3.23b  |       |           |               |
| eugenol                         | -     | 8.16 ± 2.66                                        | 7.43 ± 1.79     | 7.37 ± 2.03    | 9.5 ± 1.71     | ns    | ns        | ns            |
| eugenol                         | +     | 10.52 ± 1.59a                                      | 6.28 ± 1.07b    | 8.03 ± 0.98ab  | 5.42 ± 0.69ab  |       |           |               |
| 4-methylguaiaicol               | -     | 31.92 ± 7.99                                       | 44.35 ± 12.76   | 27.32 ± 6.45   | 33.87 ± 3.82   | ns    | ns        | ns            |
| 4-methylguaiaicol               | +     | 50.28 ± 15.72a                                     | 57.8 ± 4.88a    | 41.63 ± 1.45a  | 27.75 ± 8.62a  |       |           |               |
| 4-ethylphenol                   | -     | 6.6 ± 0.33                                         | 6.6 ± 1.39      | 4.58 ± 0.9     | 4.85 ± 0.29    | ns    | ns        | *             |
| 4-ethylphenol                   | +     | 6.04 ± 0.42a                                       | 7.11 ± 0.21a    | 5.97 ± 0.53a   | 5.3 ± 0.6a     |       |           |               |
| 4-ethylguaiaicol                | -     | 1.93 ± 0.07                                        | 1.46 ± 0.32     | 1.51 ± 0.12    | 1.68 ± 0.11    | ns    | **        | ns            |
| 4-ethylguaiaicol                | +     | 1.97 ± 0.21a                                       | 2.35 ± 0.1a     | 2.16 ± 0.22a   | 1.76 ± 0.14a   |       |           |               |
| time: harvest (T <sub>2</sub> ) |       |                                                    |                 |                |                |       |           |               |
| syringol                        | -     | 19.57 ± 2.14                                       | 22.38 ± 2.8     | 18.1 ± 0.75    | 26.81 ± 12.51  | ns    | ns        | ns            |
| syringol                        | +     | 24.28 ± 3.93a                                      | 21.31 ± 1.86a   | 24.92 ± 1.45a  | 20.98 ± 2.26a  |       |           |               |
| phenol                          | -     | 48.56 ± 7.65                                       | 54.58 ± 4.38    | 40.71 ± 3.25   | 21.3 ± 7.82    | *     | ****      | *             |
| phenol                          | +     | 133.02 ± 32.78a                                    | 290.43 ± 42.95a | 226.6 ± 26.15a | 221.16 ± 38.2a |       |           |               |
| <i>p/m</i> -cresol              | -     | 16.76 ± 4.2                                        | 18.83 ± 4.5     | 12.04 ± 0.64   | 7.05 ± 2.94    | ns    | ****      | ns            |
| <i>p/m</i> -cresol              | +     | 44.01 ± 16.42a                                     | 74.2 ± 10.06a   | 68.81 ± 5.08a  | 74.01 ± 8.82a  |       |           |               |
| <i>o</i> -cresol                | -     | 77.34 ± 20.71                                      | 51.18 ± 8.43    | 37.54 ± 8.9    | 22.92 ± 8.89   | ns    | ns        | ns            |
| <i>o</i> -cresol                | +     | 55.51 ± 13.46a                                     | 58.7 ± 4.52a    | 65.76 ± 12.02a | 61.2 ± 10.78a  |       |           |               |
| guaiaicol                       | -     | 9.59 ± 1.19                                        | 9.6 ± 0.87      | 8.85 ± 0.48    | 9.05 ± 1.42    | *     | ****      | *             |
| guaiaicol                       | +     | 23.67 ± 7.11a                                      | 64.24 ± 11.91ab | 47.27 ± 5.22ab | 45.96 ± 6.81b  |       |           |               |
| eugenol                         | -     | 4.74 ± 0.97                                        | 8.22 ± 1.94     | 5.31 ± 1.56    | 6.95 ± 1.11    | ns    | ns        | ns            |
| eugenol                         | +     | 4.67 ± 0.66a                                       | 6.51 ± 0.89a    | 7.08 ± 0.35a   | 8.25 ± 1.18a   |       |           |               |
| 4-methylguaiaicol               | -     | 1.08 ± 0.2                                         | 0.98 ± 0.23     | 1.06 ± 0.19    | 0.98 ± 0.17    | **    | ****      | **            |
| 4-methylguaiaicol               | +     | 5.35 ± 2.4a                                        | 23.91 ± 4.95ab  | 16.21 ± 1.56ab | 15.72 ± 3.37b  |       |           |               |
| 4-ethylphenol                   | -     | 14.11 ± 3.52                                       | 26.02 ± 10.54   | 10.62 ± 1.29   | 4.95 ± 2.54    | ns    | ns        | ns            |
| 4-ethylphenol                   | +     | 11.57 ± 3.35a                                      | 15.18 ± 2.15a   | 13.87 ± 1.17a  | 15.55 ± 5.94a  |       |           |               |
| 4-ethylguaiaicol                | -     | 2.59 ± 0.18                                        | 2.92 ± 0.36     | 2.23 ± 0.16    | 1.79 ± 0.8     | *     | ****      | *             |
| 4-ethylguaiaicol                | +     | 2.35 ± 0.28a                                       | 4.52 ± 0.52b    | 4.09 ± 0.29b   | 4.08 ± 0.2b    |       |           |               |

**Notes:** <sup>(1)</sup> Mean VP concentrations ( $n = 4$ ) are recorded in ng/g ± the standard error of the mean (SEM). <sup>(2)</sup> The effects of smoke (S), biofilm treatments (T) and S x T interaction were tested with a two-way ANOVA; \*, \*\*, \*\*\* and \*\*\*\* denote significant differences of  $p \leq 0.05$ ,  $p \leq 0.01$ ,  $p \leq 0.001$  and  $p \leq 0.0001$ , respectively; ns = not significant ( $p \geq 0.05$ ). <sup>(3)</sup> Different letters (within the rows) indicate the differences in effects of time of biofilm application on the smoked sample only using one-way ANOVA followed by a Tukey's HSD test. Blank cells denote concentrations below the method limit of detection.

**Table S6.** Vineyard 2: Free VP concentrations immediately after (T<sub>1</sub>) smoke-exposure and at harvest (T<sub>2</sub>).<sup>(1)(2)</sup>

| VP                                                 | smoke | biofilm application: days before smoke exposure |                |                |                | S x T | smoke (S) | treatment (T) |
|----------------------------------------------------|-------|-------------------------------------------------|----------------|----------------|----------------|-------|-----------|---------------|
|                                                    |       | control                                         | 1              | 7              | 14             |       |           |               |
| time: 1 hour post-smoke exposure (T <sub>1</sub> ) |       |                                                 |                |                |                |       |           |               |
| syringol                                           | -     |                                                 |                |                |                |       |           |               |
| syringol                                           | +     |                                                 |                |                | 0.09 ± 0       |       |           |               |
| phenol                                             | -     | 0.15 ± 0                                        | 0.32 ± 0.18    | 1.29 ± 0.81    | 0.13 ± 0       | ns    | **        | ns            |
| phenol                                             | +     | 11.83 ± 6.39a                                   | 59.06 ± 15a    | 52.29 ± 14.99a | 33.14 ± 9.23a  |       |           |               |
| <i>p/m</i> -cresol                                 | -     | 0.18 ± 0.15                                     | 0.33 ± 0.12    | 0.41 ± 0.06    | 0.35 ± 0.17    | ns    | ****      | ns            |
| <i>p/m</i> -cresol                                 | +     | 4.54 ± 1.49a                                    | 18.23 ± 3.34a  | 16.86 ± 2.43a  | 17.36 ± 6.7a   |       |           |               |
| <i>o</i> -cresol                                   | -     | 1 ± 0.23                                        | 0.82 ± 0.07    | 0.99 ± 0.13    | 1.01 ± 0.28    | ns    | ****      | ns            |
| <i>o</i> -cresol                                   | +     | 3.45 ± 1.52a                                    | 15.85 ± 3.02a  | 14.69 ± 2.22a  | 15.17 ± 5.49a  |       |           |               |
| guaiacol                                           | -     |                                                 |                |                |                |       |           |               |
| guaiacol                                           | +     | 13.35 ± 3.63a                                   | 55.94 ± 13.03a | 45.3 ± 4.95a   | 48.11 ± 18.51a |       |           |               |
| eugenol                                            | -     | 0.41 ± 0.03                                     | 0.34 ± 0.27    | 0.63 ± 0.17    | 0.44 ± 0.08    | ns    | ns        | ns            |
| eugenol                                            | +     | 0.2 ± 0.07a                                     | 0.92 ± 0.3a    | 1.01 ± 0.18a   | 0.61 ± 0.07a   |       |           |               |
| 4-methylguaiacol                                   | -     | 0.06 ± 0.03                                     | 0.25 ± 0.12    | 0.17 ± 0.08    | 0.11 ± 0.07    | *     | ****      | *             |
| 4-methylguaiacol                                   | +     | 4.19 ± 1.12a                                    | 26.21 ± 5.75a  | 21.44 ± 1.57a  | 23.43 ± 8.56a  |       |           |               |
| 4-ethylphenol                                      | -     | 0.64 ± 0.04                                     | 0.66 ± 0.04    | 0.67 ± 0.13    | 0.67 ± 0.05    | ns    | ****      | ns            |
| 4-ethylphenol                                      | +     | 1.34 ± 0.16a                                    | 2.71 ± 0.45a   | 2.55 ± 0.21a   | 2.72 ± 0.89a   |       |           |               |
| 4-ethylguaiacol                                    | -     |                                                 |                |                |                |       |           |               |
| 4-ethylguaiacol                                    | +     | 0.5 ± 0.24a                                     | 3.67 ± 0.78a   | 3.02 ± 0.29a   | 3.74 ± 1.39a   |       |           |               |
| time: harvest (T <sub>2</sub> )                    |       |                                                 |                |                |                |       |           |               |
| syringol                                           | -     | 1.11 ± 0.18                                     | 0.94 ± 0.02    | 0.92 ± 0.01    | 0.89 ± 0.01    | ns    | *         | ns            |
| syringol                                           | +     | 0.89 ± 0.06a                                    | 0.8 ± 0.02a    | 0.83 ± 0.04a   | 0.8 ± 0.01a    |       |           |               |
| phenol                                             | -     | 14.33 ± 3.94                                    | 28.78 ± 19.34  | 28.16 ± 18.74  | 27.21 ± 10.14  | ns    | ns        | ns            |
| phenol                                             | +     | 28.42 ± 8.54a                                   | 46.68 ± 15.95a | 50.75 ± 16.29a | 46.43 ± 21.06a |       |           |               |
| <i>p/m</i> -cresol                                 | -     | 2.94 ± 0.82                                     | 2.11 ± 0.17    | 7.01 ± 4.79    | 6.8 ± 2.54     | ns    | *         | ns            |
| <i>p/m</i> -cresol                                 | +     | 5.91 ± 1.88a                                    | 11.31 ± 3.68a  | 10.4 ± 2.95a   | 11.41 ± 3.97a  |       |           |               |
| <i>o</i> -cresol                                   | -     | 13.9 ± 0                                        | 27.05 ± 0      | 33.35 ± 0      | 13.15 ± 4      | *     | ****      | **            |
| <i>o</i> -cresol                                   | +     | 2.23 ± 0.93a                                    | 8.49 ± 2.5a    | 7.37 ± 0.6a    | 5.3 ± 2.41a    |       |           |               |
| guaiacol                                           | -     | 2.2 ± 0.93                                      | 1.38 ± 0.09    | 5.57 ± 4.18    | 3.91 ± 1.58    | ns    | *         | ns            |
| guaiacol                                           | +     | 6.41 ± 2.64a                                    | 12.32 ± 5.21a  | 12.15 ± 5.02a  | 10.84 ± 5.28a  |       |           |               |
| eugenol                                            | -     | 1.86 ± 0.12                                     | 2.01 ± 0.26    | 2.13 ± 0.23    | 1.98 ± 0.21    | ns    | *         | ns            |
| eugenol                                            | +     | 1.68 ± 0.21a                                    | 1.63 ± 0.06a   | 1.68 ± 0.17a   | 1.56 ± 0.15a   |       |           |               |
| 4-methylguaiacol                                   | -     | 1.1 ± 0.21                                      | 2.1 ± 1.23     | 2.23 ± 1.26    | 1.61 ± 0.45    | ns    | ns        | ns            |
| 4-methylguaiacol                                   | +     | 1.76 ± 0.69a                                    | 3.43 ± 1.15a   | 2.54 ± 0.82a   | 2.54 ± 1.06a   |       |           |               |
| 4-ethylphenol                                      | -     | 2.01 ± 0.09                                     | 2.24 ± 0.45    | 2 ± 0.13       | 2.17 ± 0.17    | ns    | ns        | ns            |
| 4-ethylphenol                                      | +     | 0.97 ± 0.27a                                    | 2.27 ± 0.59a   | 1.69 ± 0.32a   | 2.28 ± 0.72a   |       |           |               |
| 4-ethylguaiacol                                    | -     | 0.68 ± 0.03                                     | 0.87 ± 0.21    | 0.89 ± 0.23    | 0.76 ± 0.06    | ns    | **        | ns            |
| 4-ethylguaiacol                                    | +     |                                                 |                |                |                |       |           |               |

**Notes:** <sup>(1)</sup> Mean VP concentrations ( $n = 4$ ) are recorded in ng/g ± the standard error of the mean (SEM). <sup>(2)</sup> The effects of smoke (S), biofilm treatments (T) and S x T interaction were tested with a two-way ANOVA; \*, \*\*, \*\*\* and \*\*\*\* denote significant differences of  $p \leq 0.05$ ,  $p \leq 0.01$ ,  $p \leq 0.001$  and  $p \leq 0.0001$ , respectively; ns = not significant ( $p \geq 0.05$ ). <sup>(3)</sup> Different letters (within the rows) indicate the differences in effects of time of biofilm application on the smoked sample only using one-way ANOVA followed by a Tukey's HSD test. Blank cells denote concentrations below the method limit of detection.

**Table S7.** Vineyard 2: Total (*i.e.* quantitated after acid hydrolysis) VP concentrations immediately after (T<sub>1</sub>) smoke-exposure and at harvest (T<sub>2</sub>).<sup>(1)(2)</sup>

| VP                                                 | smoke | biofilm application: days before smoke exposure |                 |                 |                  | S x T | smoke (S) | treatment (T) |
|----------------------------------------------------|-------|-------------------------------------------------|-----------------|-----------------|------------------|-------|-----------|---------------|
|                                                    |       | control                                         | 1               | 7               | 14               |       |           |               |
| time: 1 hour post-smoke exposure (T <sub>1</sub> ) |       |                                                 |                 |                 |                  |       |           |               |
| syringol                                           | -     | 8.16 ± 1.82                                     | 8.15 ± 0.87     | 7.01 ± 0.39     | 6.55 ± 0.84      | ns    | ns        | ns            |
| syringol                                           | +     | 16.88 ± 7.77a                                   | 9.34 ± 0.46a    | 7.57 ± 1.01a    | 9.16 ± 1.3a      |       |           |               |
| phenol                                             | -     | 27.61 ± 5.75                                    | 23.84 ± 2.59    | 29.62 ± 3.61    | 22.54 ± 7.82     | ns    | ****      | ns            |
| phenol                                             | +     | 52.88 ± 14.75a                                  | 120.72 ± 15.29a | 73.85 ± 17.19a  | 91.11 ± 23.05a   |       |           |               |
| <i>p/m</i> -cresol                                 | -     | 337.61 ± 76.01                                  | 339.31 ± 33.78  | 426.63 ± 58.74  | 432.66 ± 211.77  | ns    | ***       | ns            |
| <i>p/m</i> -cresol                                 | +     | 90.54 ± 4.65a                                   | 97.72 ± 14.87a  | 68.06 ± 4.41a   | 98.21 ± 15.95a   |       |           |               |
| <i>o</i> -cresol                                   | -     | 3.29 ± 1.65                                     | 8.12 ± 3.59     | 2.35 ± 0.98     | 6.18 ± 1.52      | ns    | ***       | ns            |
| <i>o</i> -cresol                                   | +     | 13.82 ± 1.26a                                   | 44.89 ± 11.72a  | 32.04 ± 10.22a  | 58.92 ± 21.86a   |       |           |               |
| guaiacol                                           | -     | 3.79 ± 0.32                                     | 4.34 ± 0.44     | 5.15 ± 0.6      | 3.01 ± 0.62      | ns    | ****      | ns            |
| guaiacol                                           | +     | 17.11 ± 4.41a                                   | 72.31 ± 18.81a  | 41.1 ± 5.79a    | 59 ± 24.21a      |       |           |               |
| eugenol                                            | -     | 3.76 ± 1.23                                     | 4.54 ± 0.97     | 4.31 ± 0.82     | 3.64 ± 0.4       | ns    | ns        | ns            |
| eugenol                                            | +     | 3.36 ± 0.81a                                    | 4.98 ± 1.21a    | 3.55 ± 0.57a    | 4.81 ± 1.6a      |       |           |               |
| 4-methylguaiacol                                   | -     |                                                 | 9.79 ± 8.79     | 4.12 ± 0        | 8.98 ± 6.07      |       |           |               |
| 4-methylguaiacol                                   | +     | 7.83 ± 2.4a                                     | 26.67 ± 7.92a   | 9.15 ± 3.2a     | 27.81 ± 11.47a   |       |           |               |
| 4-ethylphenol                                      | -     | 15.48 ± 4.92                                    | 13.1 ± 1.05     | 12.1 ± 0.79     | 12.86 ± 3.26     | ns    | ns        | ns            |
| 4-ethylphenol                                      | +     | 13.59 ± 1.7a                                    | 17.51 ± 0.76a   | 14.59 ± 0.3a    | 17.95 ± 3.01a    |       |           |               |
| 4-ethylguaiacol                                    | -     | 2.79 ± 0.32                                     | 2.52 ± 0.69     | 2.38 ± 0.37     | 1.56 ± 0.24      | ns    | **        | ns            |
| 4-ethylguaiacol                                    | +     | 2.41 ± 0.33a                                    | 6.08 ± 1.36a    | 4.7 ± 0.93a     | 6.13 ± 2.06a     |       |           |               |
| time: harvest (T <sub>2</sub> )                    |       |                                                 |                 |                 |                  |       |           |               |
| syringol                                           | -     | 16.55 ± 2.53                                    | 17.58 ± 1.35    | 15.58 ± 1.15    | 11.76 ± 0.74     | *     | ns        | ns            |
| syringol                                           | +     | 13.8 ± 0.66a                                    | 12.46 ± 2.78a   | 14.87 ± 1.13a   | 16.06 ± 1.09a    |       |           |               |
| phenol                                             | -     | 62.2 ± 21.79                                    | 42.16 ± 2.53    | 52.08 ± 3.87    | 142.96 ± 59.59   | ns    | *         | ns            |
| phenol                                             | +     | 144.48 ± 53.4a                                  | 189.76 ± 85.61a | 122.96 ± 77.35a | 260.53 ± 213.48a |       |           |               |
| <i>p/m</i> -cresol                                 | -     | 19.86 ± 5.38                                    | 38.23 ± 22.87   | 37.14 ± 18.3    | 37.98 ± 11.94    | ns    | ****      | ns            |
| <i>p/m</i> -cresol                                 | +     | 122.9 ± 16.45a                                  | 131.28 ± 37.9a  | 139.96 ± 14.94a | 148.18 ± 18.74a  |       |           |               |
| <i>o</i> -cresol                                   | -     | 19.11 ± 7.89                                    | 15.1 ± 6.99     | 33.03 ± 24.43   | 26.14 ± 2.61     | ns    | ns        | ns            |
| <i>o</i> -cresol                                   | +     | 17.51 ± 5.52a                                   | 29.95 ± 9.29a   | 36.77 ± 14.54a  | 76.88 ± 20.91a   |       |           |               |
| guaiacol                                           | -     | 14.53 ± 4.15                                    | 28.25 ± 15.88   | 29.3 ± 16.31    | 21.98 ± 6.46     | ns    | *         | ns            |
| guaiacol                                           | +     | 28.3 ± 8.03a                                    | 51.22 ± 17.55a  | 48.67 ± 17.85a  | 46.27 ± 14.93a   |       |           |               |
| eugenol                                            | -     | 9.7 ± 1.74                                      | 10.57 ± 2.33    | 9.68 ± 0.87     | 9.95 ± 1.77      | ns    | ****      | ns            |
| eugenol                                            | +     | 4.15 ± 0.48a                                    | 4.04 ± 0.73a    | 3.12 ± 0.83a    | 3.68 ± 1.04a     |       |           |               |
| 4-methylguaiacol                                   | -     | 3.34 ± 1.36                                     | 2.25 ± 0.36     | 8.96 ± 6.5      | 6.2 ± 2.41       | ns    | **        | ns            |
| 4-methylguaiacol                                   | +     | 13.26 ± 1.02a                                   | 43.96 ± 21.13a  | 24.06 ± 12.37a  | 17.92 ± 4.75a    |       |           |               |
| 4-ethylphenol                                      | -     | 12.33 ± 1.52                                    | 16.16 ± 3.65    | 15.49 ± 2.47    | 15.69 ± 1.45     | ns    | ****      | ns            |
| 4-ethylphenol                                      | +     | 28.97 ± 6.22a                                   | 29.35 ± 6.15a   | 31.36 ± 5.31a   | 39.52 ± 3.91a    |       |           |               |
| 4-ethylguaiacol                                    | -     | 4.63 ± 0.2                                      | 5.09 ± 0.69     | 5.92 ± 0.87     | 5.77 ± 0.18      | ns    | ns        | ns            |
| 4-ethylguaiacol                                    | +     | 5.2 ± 0.35a                                     | 5.06 ± 0.61a    | 5.16 ± 0.51a    | 6.12 ± 0.44a     |       |           |               |

**Notes:** <sup>(1)</sup> Mean VP concentrations (*n* = 4) are recorded in ng/g ± the standard error of the mean (SEM). <sup>(2)</sup> The effects of smoke (S), biofilm treatments (T) and S x T interaction were tested with a two-way ANOVA; \*, \*\*, \*\*\* and \*\*\*\* denote significant differences of  $p \leq 0.05$ ,  $p \leq 0.01$ ,  $p \leq 0.001$  and  $p \leq 0.0001$ , respectively; ns = not significant ( $p \geq 0.05$ ). <sup>(3)</sup> Different letters (within the rows) indicate the differences in effects of time of biofilm application on the smoked sample only using one-way ANOVA followed by a Tukey's HSD test. Blank cells denote concentrations below the method limit of detection.

**Table S8.** Vineyard 3: Free VP concentrations immediately after (T<sub>1</sub>) smoke-exposure and at harvest (T<sub>2</sub>).<sup>(1)(2)</sup>

| VP                                                 | smoke | biofilm application: days before smoke exposure |                |                |                | S x T | smoke (S) | treatment (T) |
|----------------------------------------------------|-------|-------------------------------------------------|----------------|----------------|----------------|-------|-----------|---------------|
|                                                    |       | control                                         | 1              | 7              | 14             |       |           |               |
| time: 1 hour post-smoke exposure (T <sub>1</sub> ) |       |                                                 |                |                |                |       |           |               |
| syringol                                           | -     | 0.98 ± 0.02                                     | 0.97 ± 0.02    | 0.96 ± 0       | 1.02 ± 0.04    |       |           |               |
| syringol                                           | +     | 1.01 ± 0.05a                                    | 0.99 ± 0.03a   | 1.01 ± 0.05a   | 1.06 ± 0.03a   | ns    | ns        | ns            |
| phenol                                             | -     | 2.76 ± 0.33                                     | 2.51 ± 0.27    | 4.91 ± 1.45    | 2.81 ± 0.19    |       |           |               |
| phenol                                             | +     | 21.36 ± 4.69a                                   | 34.49 ± 11.71a | 27.88 ± 11.05a | 26.96 ± 5.55a  | ns    | ****      | ns            |
| <i>p/m</i> -cresol                                 | -     | 0.39 ± 0.13                                     | 0.42 ± 0.06    | 1.13 ± 0.41    | 0.8 ± 0.32     |       |           |               |
| <i>p/m</i> -cresol                                 | +     | 11.8 ± 0.95a                                    | 24.72 ± 4.51a  | 18.83 ± 1.56a  | 21.9 ± 3.17a   | ns    | ***       | ns            |
| <i>o</i> -cresol                                   | -     | 11.05 ± 4.34                                    | 7.51 ± 1.11    | 15.2 ± 3.94    | 7.05 ± 1.63    |       |           |               |
| <i>o</i> -cresol                                   | +     | 17.98 ± 3.31a                                   | 22.24 ± 5.2a   | 20.17 ± 1.12a  | 22.06 ± 2.12a  | ns    | ***       | ns            |
| guaiaicol                                          | -     | 0.66 ± 0.15                                     | 0.88 ± 0.09    | 0.59 ± 0.09    | 0.56 ± 0.12    |       |           |               |
| guaiaicol                                          | +     | 19.69 ± 3.75a                                   | 39.45 ± 9.56a  | 29.32 ± 2.37a  | 34.46 ± 8.37a  | ns    | ****      | ns            |
| eugenol                                            | -     | 1.17 ± 0.02                                     | 1.1 ± 0.01     | 1.25 ± 0.02    | 1.11 ± 0.01    |       |           |               |
| eugenol                                            | +     | 1.11 ± 0.01a                                    | 1.57 ± 0.12b   | 1.47 ± 0.07ab  | 1.55 ± 0.07b   | **    | ****      | *             |
| 4-methylguaiaicol                                  | -     | 0.11 ± 0.06                                     | 0.2 ± 0.05     | 0.34 ± 0.04    |                |       |           |               |
| 4-methylguaiaicol                                  | +     | 8.45 ± 2.06a                                    | 16.72 ± 3.94a  | 12.63 ± 2.37a  | 15.97 ± 4.32a  |       |           |               |
| 4-ethylphenol                                      | -     | 1.57 ± 0.15                                     | 1.51 ± 0.12    | 1.39 ± 0.05    | 1.57 ± 0.12    |       |           |               |
| 4-ethylphenol                                      | +     | 3.7 ± 0.58a                                     | 6.45 ± 0.74a   | 5.07 ± 0.25a   | 5.96 ± 0.79a   | *     | ****      | *             |
| 4-ethylguaiaicol                                   | -     |                                                 |                | 0.05 ± 0.04    |                |       |           |               |
| 4-ethylguaiaicol                                   | +     | 1.14 ± 0.38a                                    | 2.87 ± 0.68a   | 1.77 ± 0.23a   | 2.46 ± 0.68a   |       |           |               |
| time: harvest (T <sub>2</sub> )                    |       |                                                 |                |                |                |       |           |               |
| syringol                                           | -     |                                                 |                |                |                | -     | -         | -             |
| syringol                                           | +     | 0.08 ± 0.01a                                    | 0.08 ± 0.01a   | 0.14 ± 0ab     | 0.15 ± 0.03b   |       |           |               |
| phenol                                             | -     | 10.31 ± 0.63                                    | 9.63 ± 0.35    | 9.35 ± 0.3     | 9.36 ± 0.16    | *     | ****      | *             |
| phenol                                             | +     | 58.02 ± 9.2a                                    | 65.82 ± 2.96a  | 83.35 ± 9.25a  | 90.13 ± 13.89a |       |           |               |
| <i>p/m</i> -cresol                                 | -     | 1.39 ± 0.1                                      | 1.32 ± 0.05    | 1.37 ± 0.06    | 1.27 ± 0.07    | ns    | ****      | ns            |
| <i>p/m</i> -cresol                                 | +     | 14.73 ± 2.54a                                   | 17.11 ± 1.53a  | 17.69 ± 1.05a  | 20.85 ± 2.54a  |       |           |               |
| <i>o</i> -cresol                                   | -     | 10.17 ± 1.35                                    | 11.22 ± 0.69   | 10.43 ± 1.13   | 9.24 ± 0.59    | ****  | ****      | ****          |
| <i>o</i> -cresol                                   | +     | 10.38 ± 0.64a                                   | 12.02 ± 0.8a   | 22.73 ± 1.37b  | 30.76 ± 3.84b  |       |           |               |
| guaiaicol                                          | -     | 0.68 ± 0.04                                     | 0.64 ± 0.07    | 0.52 ± 0.05    | 0.53 ± 0.03    | ns    | ****      | ns            |
| guaiaicol                                          | +     | 9.47 ± 1.35a                                    | 14.47 ± 1.73a  | 12.29 ± 1.44a  | 12.89 ± 1.94a  |       |           |               |
| eugenol                                            | -     | 0.95 ± 0.23                                     | 0.6 ± 0.08     | 0.34 ± 0.1     | 0.28 ± 0.05    | ns    | ****      | ***           |
| eugenol                                            | +     | 0.61 ± 0.06a                                    | 0.53 ± 0.04a   | 1.18 ± 0.05ab  | 1.45 ± 0.33b   |       |           |               |
| 4-methylguaiaicol                                  | -     | 0.23 ± 0                                        | 0.2 ± 0.01     | 0.17 ± 0.01    | 0.19 ± 0.01    | ns    | ****      | ns            |
| 4-methylguaiaicol                                  | +     | 2.84 ± 0.51a                                    | 4.25 ± 0.46a   | 4.06 ± 0.33a   | 4.25 ± 0.7a    |       |           |               |
| 4-ethylphenol                                      | -     | 1.15 ± 0.03                                     | 1.08 ± 0.02    | 1.11 ± 0.05    | 1.04 ± 0.03    | ns    | **        | ns            |
| 4-ethylphenol                                      | +     | 1.94 ± 0.36a                                    | 2.37 ± 0.55a   | 1.17 ± 0.13a   | 1.61 ± 0.23a   |       |           |               |
| 4-ethylguaiaicol                                   | -     | 0.05 ± 0.01                                     | 0.06 ± 0       | 0.07 ± 0.02    | 0.06 ± 0.01    | *     | ****      |               |
| 4-ethylguaiaicol                                   | +     | 0.86 ± 0.1a                                     | 0.97 ± 0.08a   | 0.68 ± 0.03a   | 0.72 ± 0.08a   |       |           | ns            |

**Notes:** <sup>(1)</sup> Mean VP concentrations ( $n = 4$ ) are recorded in ng/g ± the standard error of the mean (SEM). <sup>(2)</sup> The effects of smoke (S), biofilm treatments (T) and S x T interaction were tested with a two-way ANOVA; \*, \*\*, \*\*\* and \*\*\*\* denote significant differences of  $p \leq 0.05$ ,  $p \leq 0.01$ ,  $p \leq 0.001$  and  $p \leq 0.0001$ , respectively; ns = not significant ( $p \geq 0.05$ ). <sup>(3)</sup> Different letters (within the rows) indicate the differences in effects of time of biofilm application on the smoked sample only using one-way ANOVA followed by a Tukey's HSD test. Blank cells denote concentrations below the method limit of detection.



**Table S9.** Vineyard 3: Total (*i.e.* quantitated after acid hydrolysis) VP concentrations immediately after (T<sub>1</sub>) smoke-exposure and at harvest (T<sub>2</sub>).<sup>(1)(2)</sup>

| VP                                                 | smoke | biofilm application: days before smoke exposure |                  |                  |                 | S x T | smoke (S) | treatment (T) |
|----------------------------------------------------|-------|-------------------------------------------------|------------------|------------------|-----------------|-------|-----------|---------------|
|                                                    |       | control                                         | 1                | 7                | 14              |       |           |               |
| time: 1 hour post-smoke exposure (T <sub>1</sub> ) |       |                                                 |                  |                  |                 |       |           |               |
| syringol                                           | -     | 7.42 ± 3.65                                     | 6.38 ± 0         | 13.2 ± 0         | 3.96 ± 1.38     | ns    | *         | ns            |
| syringol                                           | +     | 6.45 ± 0a                                       | 2.72 ± 1.23a     | 3.18 ± 0.94a     | 3.03 ± 0.7a     |       |           |               |
| phenol                                             | -     | 44.86 ± 2.9                                     | 49.56 ± 2.58     | 47.28 ± 7.05     | 34.32 ± 6.29    | ns    | ****      | ns            |
| phenol                                             | +     | 112.55 ± 11.27a                                 | 141.86 ± 26.2a   | 119.98 ± 20.8a   | 114.55 ± 17.94a |       |           |               |
| <i>p/m</i> -cresol                                 | -     | 120.98 ± 18.58                                  | 81.13 ± 17.83    | 111.4 ± 12.54    | 70.95 ± 29.54   | ns    | ns        | ns            |
| <i>p/m</i> -cresol                                 | +     | 133 ± 27.97a                                    | 102.11 ± 10.07a  | 102.73 ± 6.75a   | 99.8 ± 6.71a    |       |           |               |
| <i>o</i> -cresol                                   | -     | 64.52 ± 9.71                                    | 75.24 ± 16.71    | 55.87 ± 16.7     | 35.25 ± 10.51   | ns    | ns        | *             |
| <i>o</i> -cresol                                   | +     | 80.23 ± 11.45a                                  | 48.98 ± 16.73a   | 40.11 ± 6.61a    | 33.09 ± 4.9a    |       |           |               |
| guaiacol                                           | -     | 4.73 ± 0.62                                     | 4.97 ± 0.13      | 3.62 ± 0.26      | 4.87 ± 0.63     | ns    | ****      | ns            |
| guaiacol                                           | +     | 21.45 ± 2.19a                                   | 47.71 ± 14.2a    | 32.05 ± 1.42a    | 39.67 ± 8.82a   |       |           |               |
| eugenol                                            | -     |                                                 | 0.47 ± 0.37      |                  | 0.43 ± 0.1      |       |           |               |
| eugenol                                            | +     | 0.39 ± 0.00a                                    |                  | 0.39 ± 0.32a     | 0.43            |       |           |               |
| 4-methylguaiacol                                   | -     | 283.46 ± 72.35                                  | 303.72 ± 86.05   | 102.81 ± 53.03   | 244.32 ± 78.03  | ns    | ns        | ns            |
| 4-methylguaiacol                                   | +     | 263.82 ± 35.79a                                 | 193.35 ± 105.32a | 207.18 ± 65.16a  | 328.56 ± 58.4a  |       |           |               |
| 4-ethylphenol                                      | -     | 68.1 ± 11.68                                    | 59.7 ± 5.12      | 50.84 ± 17.77    | 28.17 ± 11.35   | ns    | ns        | ns            |
| 4-ethylphenol                                      | +     | 81.81 ± 20.35a                                  | 56.54 ± 9.88a    | 59.76 ± 7.42a    | 54.11 ± 6.9a    |       |           |               |
| 4-ethylguaiacol                                    | -     | 1.74 ± 0.27                                     | 2.29 ± 0.18      | 1.5 ± 0.24       | 2.43 ± 0.29     | ns    | ****      | *             |
| 4-ethylguaiacol                                    | +     | 2.96 ± 0.4a                                     | 6.5 ± 1.54a      | 4.19 ± 0.29a     | 5.43 ± 0.8a     |       |           |               |
| time: harvest (T <sub>2</sub> )                    |       |                                                 |                  |                  |                 |       |           |               |
| syringol                                           | -     | 11.86 ± 0.24                                    | 12.27 ± 1.59     | 9.65 ± 1.51      | 9.48 ± 0.53     | ns    | ***       | ns            |
| syringol                                           | +     | 13.8 ± 0.7a                                     | 18.77 ± 2.82a    | 14.34 ± 1.35a    | 14.17 ± 0.42a   |       |           |               |
| phenol                                             | -     | 35.31 ± 2.16                                    | 35.14 ± 2.6      | 34.83 ± 5.09     | 38.2 ± 2.02     | *     | ****      | *             |
| phenol                                             | +     | 241.46 ± 21.55a                                 | 422.92 ± 67.95a  | 406.36 ± 25.58a  | 320.43 ± 34.24a |       |           |               |
| <i>p/m</i> -cresol                                 | -     | 7.5 ± 0.5                                       | 8.93 ± 0.41      | 8.54 ± 0.65      | 8.9 ± 0.43      | ns    | ****      | ns            |
| <i>p/m</i> -cresol                                 | +     | 65.72 ± 6.97a                                   | 109.08 ± 19.71a  | 108.1 ± 8.21a    | 89.95 ± 13.34a  |       |           |               |
| <i>o</i> -cresol                                   | -     | 65.46 ± 13.25                                   | 72.39 ± 24.11    | 73.46 ± 8.69     | 64.36 ± 4       | ns    | ***       | *             |
| <i>o</i> -cresol                                   | +     | 76.48 ± 3.24a                                   | 151.43 ± 21.73ab | 134.71 ± 15.86ab | 90.41 ± 9.42b   |       |           |               |
| guaiacol                                           | -     | 5.84 ± 0.34                                     | 4.89 ± 0.19      | 6.7 ± 1.49       | 5.55 ± 0.18     | *     | ****      | *             |
| guaiacol                                           | +     | 41.42 ± 3.57a                                   | 57.45 ± 6.76b    | 57.9 ± 2.04ab    | 61.91 ± 3.79ab  |       |           |               |
| eugenol                                            | -     | 5.57 ± 1.04                                     | 4.45 ± 1.23      | 2.91 ± 0.31      | 2.84 ± 0.3      | *     | ***       | ns            |
| eugenol                                            | +     | 6.03 ± 0.13a                                    | 4.9 ± 0.52a      | 6.07 ± 0.38a     | 6.33 ± 0.35a    |       |           |               |
| 4-methylguaiacol                                   | -     | 0.56 ± 0.08                                     | 0.44 ± 0.09      | 0.41 ± 0.07      | 0.38 ± 0.02     | **    | ****      | **            |
| 4-methylguaiacol                                   | +     | 15.01 ± 1.82a                                   | 21.52 ± 2.77b    | 22.8 ± 0.63ab    | 25.36 ± 1.95ab  |       |           |               |
| 4-ethylphenol                                      | -     | 13.34 ± 2.83                                    | 13.43 ± 2.45     | 13.7 ± 2.93      | 14.88 ± 1.83    | *     | **        | ns            |
| 4-ethylphenol                                      | +     | 14.88 ± 0.69a                                   | 26.19 ± 2.29a    | 23.66 ± 2.08ab   | 14.83 ± 2.9b    |       |           |               |
| 4-ethylguaiacol                                    | -     | 3.01 ± 0.26                                     | 2.5 ± 0.23       | 3.35 ± 0.58      | 2.7 ± 0.28      | ns    | ****      | ns            |
| 4-ethylguaiacol                                    | +     | 4.21 ± 0.22a                                    | 4.97 ± 0.28a     | 5.11 ± 0.17a     | 4.78 ± 0.53a    |       |           |               |

**Notes:** <sup>(1)</sup> Mean VP concentrations (*n* = 4) are recorded in ng/g ± the standard error of the mean (SEM). <sup>(2)</sup> The effects of smoke (S), biofilm treatments (T) and S x T interaction were tested with a two-way ANOVA; \*, \*\*, \*\*\* and \*\*\*\* denote significant differences of  $p \leq 0.05$ ,  $p \leq 0.01$ ,  $p \leq 0.001$  and  $p \leq 0.0001$ , respectively; ns = not significant ( $p \geq 0.05$ ). <sup>(3)</sup> Different letters (within the rows) indicate the differences in effects of time of biofilm application on the smoked sample only using one-way ANOVA followed by a Tukey's HSD test. Blank cells denote concentrations below the method limit of detection.

**Table S10.** Meteorological data collected for the vineyards used in biofilm field studies.

| vineyard          | conditions                       | date<br>day/month/year | temperature <sup>(1,2)</sup><br>(°C) | max.<br>temperature | min.<br>temperature | precipitation<br>(mm) | mean<br>temperature <sup>(3)</sup> | total<br>precipitation <sup>(3)</sup> |
|-------------------|----------------------------------|------------------------|--------------------------------------|---------------------|---------------------|-----------------------|------------------------------------|---------------------------------------|
| V1                | biofilm; 14 days                 | 29/08/2019             | 17.2                                 | 31.4                | 8.5                 | 0                     |                                    |                                       |
| V1                | biofilm; seven days              | 05/09/2019             | 15.9                                 | 27.8                | 9.6                 | 1.8                   |                                    |                                       |
| V1                | biofilm; one day                 | 11/09/2019             | 13.9                                 | 23.2                | 12.1                | 0.6                   |                                    |                                       |
| V1                | smoke exposure (T <sub>1</sub> ) | 12/09/2019             | 14.2                                 | 23.1                | 9.9                 | 0.4                   |                                    |                                       |
| V1                | harvest (T <sub>2</sub> )        | 30/09/2019             | 4.5                                  | 10.0                | 1.9                 | 0                     | 15.6                               | 36.4                                  |
| V2                | biofilm; 14 days                 | 23/08/2019             | 13.1                                 | 20.0                | 9                   | 0.7                   |                                    |                                       |
| V2                | biofilm; seven days              | 30/08/2019             | 19.0                                 | 30.1                | 13.9                | 0                     |                                    |                                       |
| V2                | biofilm; one day                 | 05/09/2019             | 15.9                                 | 27.8                | 9.6                 | 1.8                   |                                    |                                       |
| V2                | smoke exposure (T <sub>1</sub> ) | 06/09/2019             | 16.8                                 | 28.9                | 9.6                 | 0                     |                                    |                                       |
| V2                | harvest (T <sub>2</sub> )        | 06/10/2019             | 3.7                                  | 14.2                | -0.4                | 0                     | 14.7                               | 48.3                                  |
| V3                | biofilm; 14 days                 | 03/09/2019             | 16.1                                 | 30.1                | 8.3                 | 0                     |                                    |                                       |
| V3                | biofilm; seven days              | 10/09/2019             | 14.4                                 | 21.6                | 11.1                | 2.9                   |                                    |                                       |
| V3                | biofilm; one day                 | 16/09/2019             | 11.6                                 | 19.3                | 10.1                | 0.2                   |                                    |                                       |
| V3                | smoke exposure (T <sub>1</sub> ) | 17/09/2019             | 12.8                                 | 17.3                | 8.9                 | 3.6                   |                                    |                                       |
| V3                | harvest (T <sub>2</sub> )        | 26/09/2019             | 11.6                                 | 17.3                | 6.9                 | 1.5                   | 16.8                               | 41.0                                  |
| V2 <sup>(4)</sup> | biofilm; seven days              | 08/24/2018             | 14.7                                 | 29.6                | 9.2                 | 0                     |                                    |                                       |
| V2 <sup>(4)</sup> | smoke exposure 1                 | 08/31/2018             | 13.5                                 | 25.5                | 7.9                 | 0                     |                                    |                                       |
| V2 <sup>(4)</sup> | smoke exposure 1                 | 09/02/2018             | 10.8                                 | 25.8                | 8.5                 | 5.4                   |                                    |                                       |
| V2 <sup>(4)</sup> | harvest                          | 09/14/2018             | 6.2                                  | 12.7                | 4.6                 | 0.4                   | 15.7                               | 11.6                                  |

**Notes:** <sup>(1)</sup>All historical weather data collected by the Government of Canada and accessible online at [https://climate.weather.gc.ca/historical\\_data/search\\_historic\\_data\\_e.html](https://climate.weather.gc.ca/historical_data/search_historic_data_e.html); the data obtained were from the Kelowna, BC meteorological station. <sup>(2)</sup>Temperature at 0700 local time, when vineyard procedures were performed with the exception of sample collection at harvest. <sup>(3)</sup>Mean temperature and total precipitation between the first spray application (*i.e.* 14-days post smoke-exposure) and harvest. <sup>(4)</sup>V2 was the site of our initial evaluation of the biofilm spray also using Pinot Noir grapevines as described by Favell *et al.* (2019); biofilm and smoke applications were identical although the specific grapevines used differed.

**Table S11.** Chemical composition of must and wines.

| cold soak                    |                 |                    |                            |             |                     |                           |                     |                              |                                              |
|------------------------------|-----------------|--------------------|----------------------------|-------------|---------------------|---------------------------|---------------------|------------------------------|----------------------------------------------|
| treatment                    |                 | parameter          |                            |             |                     |                           |                     |                              |                                              |
| smoke                        | days post-spray | °Brix              | TA <sup>(1)</sup><br>(g/L) | pH          | malic acid<br>(g/L) | α-amino acids<br>(mg/L)   | ammonia<br>(mg/L)   | YAN <sup>(2)</sup><br>(mg/L) | potassium<br>(mg/L)                          |
| -                            | control         | 20.7               | 5.0                        | 3.64        | 3.26                | 188                       | 61                  | 239                          | 1223                                         |
| -                            | 1               | 21.8               | 5.0                        | 3.60        | 3.23                | 163                       | 47                  | 201                          | 1210                                         |
| -                            | 7               | 20.2               | 4.9                        | 3.58        | 3.04                | 157                       | 44                  | 194                          | 1105                                         |
| -                            | 14              | 20.3               | 4.9                        | 3.59        | 3.06                | 164                       | 50                  | 205                          | 1100                                         |
| +                            | control         | 21.5               | 5.2                        | 3.59        | 3.24                | 163                       | 50                  | 204                          | 1148                                         |
| +                            | 1               | 21.6               | 4.9                        | 3.60        | 2.94                | 153                       | 43                  | 188                          | 1154                                         |
| +                            | 7               | 21.0               | 5.2                        | 3.59        | 2.97                | 148                       | 42                  | 182                          | 1123                                         |
| +                            | 14              | 20.8               | 5.3                        | 3.61        | 3.26                | 169                       | 53                  | 212                          | 1176                                         |
| after alcoholic fermentation |                 |                    |                            |             |                     |                           |                     |                              |                                              |
| smoke                        | days post-spray | alcohol<br>(% v/v) | residual sugar<br>(g/L)    | TA<br>(g/L) | pH                  | volatile<br>acidity (g/L) | malic acid<br>(g/L) | lactic acid<br>(g/L)         | FC/A <sub>280</sub> <sup>(3)</sup><br>(mg/L) |
| -                            | control         | 12.8               | 0.4                        | 6.0         | 3.67                | 0.22                      | 2.62                | 0.3                          | 44.6                                         |
| -                            | 1               | 13.5               | 0.4                        | 6.2         | 3.67                | 0.27                      | 2.51                | 0.3                          | 46.7                                         |
| -                            | 7               | 12.7               | 0.3                        | 6.2         | 3.60                | 0.20                      | 2.49                | 0.3                          | 44.2                                         |
| -                            | 14              | 13.1               | 0.5                        | 6.0         | 3.64                | 0.20                      | 2.49                | 0.3                          | 46.8                                         |
| +                            | control         | 13.4               | 0.4                        | 6.2         | 3.65                | 0.25                      | 2.57                | 0.3                          | 47.8                                         |
| +                            | 1               | 13.7               | 0.4                        | 6.2         | 3.63                | 0.26                      | 2.24                | 0.3                          | 51.6                                         |
| +                            | 7               | 12.9               | 0.4                        | 6.2         | 3.61                | 0.29                      | 2.45                | 0.3                          | 44.5                                         |
| +                            | 14              | 13.0               | 0.3                        | 6.2         | 3.65                | 0.21                      | 2.58                | 0.3                          | 49.3                                         |

Notes: <sup>(1)</sup>TA = titratable acidity; <sup>(2)</sup>YAN = yeast assimilable nitrogen. (3) FC = Folin-Ciocalteu method for determining total polyphenols; A<sub>280</sub> = ultraviolet absorbance at 280 nm.

**Table S12.** Concentration of free VPs in must and wine samples.<sup>(1)(2)</sup>

| VP                 | smoke | biofilm application: days before smoke exposure |                |                 |               | S x T | smoke (S) | treatment (T) |
|--------------------|-------|-------------------------------------------------|----------------|-----------------|---------------|-------|-----------|---------------|
|                    |       | control                                         | 1              | 7               | 14            |       |           |               |
|                    |       | must                                            |                |                 |               |       |           |               |
| syringol           | -     | 1.18 ± 0                                        |                |                 | 1.27 ± 0      |       |           |               |
| syringol           | +     |                                                 |                |                 |               |       |           |               |
| phenol             | -     | 1.92 ± 0.46                                     | 8.25 ± 0.14    | 5.96 ± 0.24     | 8.58 ± 0.49   |       |           |               |
| phenol             | +     | 22.98 ± 0.97a                                   | 26.71 ± 11.16a | 20.48 ± 8.66a   | 35.92 ± 0.36a | ns    | ****      | ns            |
| <i>p/m</i> -cresol | -     |                                                 | 3.82 ± 1.1     | 4.34 ± 0.4      | 5.59 ± 1.67   |       |           |               |
| <i>p/m</i> -cresol | +     | 5.33 ± 1.8a                                     | 9.92 ± 0.81a   | 6.41 ± 2.28a    | 11.09 ± 4.78a |       |           |               |
| <i>o</i> -cresol   | -     | 3.58 ± 0                                        | 10.25 ± 4.22   | 9.31 ± 1.22     | 12.3 ± 2.21   |       |           |               |
| <i>o</i> -cresol   | +     | 6.71 ± 4.61a                                    | 5.97 ± 2.22a   | 6.9 ± 0.76a     | 7.68 ± 1.15a  | ns    | ns        | ns            |
| guaiacol           | -     |                                                 | 1.24 ± 0.12    | 1.15 ± 0        |               |       |           |               |
| guaiacol           | +     | 4.09 ± 0.23a                                    | 7.12 ± 2.63a   | 7.83 ± 0.01a    | 7.52 ± 0.01a  |       |           |               |
| eugenol            | -     |                                                 |                |                 |               |       |           |               |
| eugenol            | +     |                                                 |                |                 |               |       |           |               |
| 4-methylguaiacol   | -     |                                                 |                |                 |               |       |           |               |
| 4-methylguaiacol   | +     |                                                 | 2.32 ± 0.04b   | 2.19 ± 0.19b    | 1.52 ± 0.12a  |       |           |               |
| 4-ethylphenol      | -     |                                                 |                |                 |               |       |           |               |
| 4-ethylphenol      | +     |                                                 |                | 1.36 ± 0        |               |       |           |               |
| 4-ethylguaiacol    | -     | 1.23 ± 0a                                       | 1.82 ± 0.04bc  | 1.47 ± 0.04ab   | 1.9 ± 0.12c   |       |           |               |
| 4-ethylguaiacol    | +     |                                                 |                |                 |               |       |           |               |
| wine               |       |                                                 |                |                 |               |       |           |               |
| syringol           | -     | 4.2 ± 1.22                                      | 4.03 ± 0.6     | 32.2 ± 28.54    | 4.51 ± 0.26   |       |           |               |
| syringol           | +     | 3.46 ± 0.18a                                    | 3.69 ± 0.09a   | 193.29 ± 35.81b | 4.29 ± 0.31a  | ***   | **        | ****          |
| phenol             | -     | 4.89 ± 0.26                                     | 7.85 ± 0.65    | 12.93 ± 0.68    | 6.07 ± 0.29   |       |           |               |
| phenol             | +     | 37.18 ± 0.03a                                   | 71.39 ± 1.53c  | 57.44 ± 0.68b   | 70.45 ± 3.46c | ****  | ****      | ****          |
| <i>p/m</i> -cresol | -     |                                                 | 2.53 ± 0.27    | 3.12 ± 0.17     | 1.47 ± 0.32   |       |           |               |
| <i>p/m</i> -cresol | +     | 11.38 ± 0.06a                                   | 22.1 ± 0.5a    | 13.49 ± 5.58a   | 23.84 ± 0.77a |       |           |               |
| <i>o</i> -cresol   | -     | 71.76 ± 8.67                                    | 20.45 ± 9.63   | 3.33 ± 0.14     | 2.18 ± 0.11   |       |           |               |
| <i>o</i> -cresol   | +     | 32.26 ± 1.68b                                   | 15.57 ± 0.47a  | 12.57 ± 0.54a   | 16.85 ± 0.17a | ***   | ns        | ****          |
| guaiacol           | -     |                                                 | 2.2 ± 0.44     | 1.9 ± 0.27      |               |       |           |               |
| guaiacol           | +     | 9.08 ± 0.22a                                    | 19.06 ± 0.47c  | 14.51 ± 0.16b   | 15.41 ± 0.91b |       |           |               |
| eugenol            | -     | 1.38 ± 0.26                                     | 1.71 ± 0.01    | 14.84 ± 13.2    | 1.5 ± 0.04    |       |           |               |
| eugenol            | +     | 1.43 ± 0.23a                                    | 1.61 ± 0.12a   | 55.9 ± 23.08a   | 1.57 ± 0.15a  | ns    | ns        | *             |
| 4-methylguaiacol   | -     |                                                 |                | 1.74 ± 0        |               |       |           |               |
| 4-methylguaiacol   | +     | 2.24 ± 0.17a                                    | 6.47 ± 0.54b   | 4.74 ± 0.3b     | 5.44 ± 0.55b  |       |           |               |
| 4-ethylphenol      | -     |                                                 | 1.62 ± 0.14    | 1.18 ± 0        |               |       |           |               |
| 4-ethylphenol      | +     | 2.59 ± 0.05a                                    | 2.77 ± 0.03a   | 2.6 ± 0.05a     | 2.82 ± 0.19a  |       |           |               |
| 4-ethylguaiacol    | -     |                                                 |                |                 |               |       |           |               |
| 4-ethylguaiacol    | +     |                                                 |                |                 |               |       |           |               |

**Notes:** <sup>(1)</sup> Mean VP concentrations ( $n = 4$ ) are recorded in ng/g ± the standard error of the mean (SEM). <sup>(2)</sup> The effects of smoke (S), biofilm treatments (T) and S x T interaction were tested with a two-way ANOVA; \*, \*\*, \*\*\* and \*\*\*\* denote significant differences of  $p \leq 0.05$ ,  $p \leq 0.01$ ,  $p \leq 0.001$  and  $p \leq 0.0001$ , respectively; ns = not significant ( $P \geq 0.05$ ). Different letters (within the rows) indicate the differences in effects of time of biofilm application on the smoked sample only using one-way ANOVA followed by a Tukey's HSD test. Blank cells denote concentrations below the method limit of detection

**Table S13.** Concentration of total (free plus acid-labile) VPs in must and wine samples.<sup>(1)(2)</sup>

| VP                 | smoke | biofilm application: days before smoke exposure |                  |                  |                 | S x T | smoke (S) | treatment (T) |
|--------------------|-------|-------------------------------------------------|------------------|------------------|-----------------|-------|-----------|---------------|
|                    |       | control                                         | 1                | 7                | 14              |       |           |               |
| must               |       |                                                 |                  |                  |                 |       |           |               |
| syringol           | -     | 113.01 ± 14.24                                  | 26.34 ± 10.7     | 18.94 ± 4.26     | 8 ± 0.18        |       |           |               |
| syringol           | +     | 37.74 ± 25.57a                                  | 21.55 ± 3.43a    | 12.49 ± 3.51a    | 9.58 ± 1a       | *     | *         | ****          |
| phenol             | -     | 39.27 ± 2.64                                    | 147.15 ± 85.21   | 55.3 ± 3.4       | 63.64 ± 4.47    |       |           |               |
| phenol             | +     | 156.38 ± 1.31a                                  | 195.52 ± 66.97a  | 151.52 ± 73.55a  | 202.13 ± 10.12a | ns    | **        | ns            |
| <i>p/m</i> -cresol | -     | 11.87 ± 0.2                                     | 37.13 ± 20.44    | 8.13 ± 5.86      | 150.15 ± 142.09 |       |           |               |
| <i>p/m</i> -cresol | +     | 51.74 ± 2.81a                                   | 57.27 ± 19.64a   | 52.09 ± 12.54a   | 35.11 ± 1.31a   | ns    | ns        | ns            |
| <i>o</i> -cresol   | -     | 189.3 ± 176.99                                  | 46.13 ± 22.23    | 22.76 ± 3.62     | 9.91 ± 3.51     |       |           |               |
| <i>o</i> -cresol   | +     | 39.21 ± 16.85a                                  | 66.72 ± 21.91a   | 167.64 ± 108.43a | 57.81 ± 3.35a   | ns    | ns        | ns            |
| guaiaicol          | -     | 6.74 ± 0.99                                     | 5.33 ± 2.43      | 1.55 ± 0.1       | 1.65 ± 0.29     |       |           |               |
| guaiaicol          | +     | 5.89 ± 0.78a                                    | 6.82 ± 2.68a     | 6.22 ± 3.32a     | 10.97 ± 4.49a   | ns    | ns        | ns            |
| eugenol            | -     | 4.58 ± 0.3                                      | 4.77 ± 0.2       | 4.47 ± 0.12      | 3.46 ± 0.51     |       |           |               |
| eugenol            | +     | 4.09 ± 0.19a                                    | 4.56 ± 0.24a     | 3.01 ± 0.56a     | 4.54 ± 0.18a    | *     | ns        | ns            |
| 4-methylguaiaicol  | -     |                                                 | 21.9 ± 19.64     |                  |                 |       |           |               |
| 4-methylguaiaicol  | +     | 1.46 ± 0.29a                                    | 2.63 ± 0.14a     | 2.34 ± 1.05a     | 4.78 ± 0.88a    | -     | -         | -             |
| 4-ethylphenol      | -     | 16.02 ± 1.55                                    | 21.6 ± 4.83      | 13.56 ± 6.41     | 16.25 ± 1.29    |       |           |               |
| 4-ethylphenol      | +     | 16.91 ± 7.15a                                   | 23.14 ± 3.13a    | 10.14 ± 7.2a     | 16.1 ± 1.77a    | ns    | **        | ns            |
| 4-ethylguaiaicol   | -     | 2.62 ± 0.63                                     | 1.38 ± 0         | 1.35 ± 0         | 1.19 ± 0.07     |       |           |               |
| 4-ethylguaiaicol   | +     | 2.35 ± 0.14a                                    | 1.11 ± 0a        | 1.7 ± 0a         | 1.71 ± 0.25a    | ns    | ns        | ns            |
| wine               |       |                                                 |                  |                  |                 |       |           |               |
| syringol           | -     | 9.16 ± 0.05                                     | 4.92 ± 3.41      | 9.05 ± 0.09      | 6.57 ± 2.62     |       |           |               |
| syringol           | +     | 8.38 ± 3.63a                                    | 12.34 ± 0.53a    | 12.32 ± 0a       | 10.41 ± 0.82a   | ns    | ns        | ns            |
| phenol             | -     | 56.51 ± 4.7                                     | 67.57 ± 30.77    | 106.85 ± 6.65    | 65.7 ± 5.49     |       |           |               |
| phenol             | +     | 153.76 ± 70.65a                                 | 150.58 ± 108.28a | 154.51 ± 117.07a | 226.83 ± 99.53a | ns    | ns        | ns            |
| <i>p/m</i> -cresol | -     | 6.47 ± 0.98                                     | 12.85 ± 0.17     | 14.97 ± 0.37     | 6.66 ± 2.73     |       |           |               |
| <i>p/m</i> -cresol | +     | 36.28 ± 2.56a                                   | 61.82 ± 2.58a    | 37.39 ± 15.46a   | 54.4 ± 4.9a     | ns    | ****      | ns            |
| <i>o</i> -cresol   | -     | 12.52 ± 0.65                                    | 17 ± 7.62        | 24.54 ± 1.3      | 14.98 ± 0.95    |       |           |               |
| <i>o</i> -cresol   | +     | 46.49 ± 21.69a                                  | 117.69 ± 14.61a  | 101.21 ± 11.78a  | 96.38 ± 14.49a  | ns    | ****      | *             |
| guaiaicol          | -     | 15.14 ± 1.1                                     | 18.18 ± 8.15     | 23.84 ± 2.18     | 15.72 ± 0.82    |       |           |               |
| guaiaicol          | +     | 39.29 ± 4.46b                                   | 64.69 ± 4.98a    | 53.19 ± 5.45ab   | 52.13 ± 5.22ab  | ns    | ****      | *             |
| eugenol            | -     | 2.37 ± 0.51                                     | 1.87 ± 0.17      | 1.82 ± 0.09      | 2.29 ± 0.06     |       |           |               |
| eugenol            | +     | 2.02 ± 0.22a                                    | 1.88 ± 0.47a     | 1.83 ± 0.37a     | 1.95 ± 0.16a    | ns    | ns        | ns            |
| 4-methylguaiaicol  | -     | 1.85 ± 0                                        | 2.07 ± 0.09      | 2.78 ± 0         | 1.18 ± 0.06     |       |           |               |
| 4-methylguaiaicol  | +     | 4.28 ± 2.59b                                    | 19.62 ± 0.97a    | 16.06 ± 0.28b    | 17.82 ± 1.05b   | **    | ****      | **            |
| 4-ethylphenol      | -     | 15.52 ± 3.2                                     | 19.63 ± 7.02     | 19.82 ± 6.65     | 13.37 ± 5.17    |       |           |               |
| 4-ethylphenol      | +     | 19.71 ± 2.43a                                   | 39.46 ± 3.97a    | 19.54 ± 12.71a   | 31.8 ± 5.88a    | ns    | *         | ns            |
| 4-ethylguaiaicol   | -     | 3.38 ± 0.26                                     | 3.28 ± 0.53      | 5.62 ± 0.39      | 5.11 ± 0.19     |       |           |               |
| 4-ethylguaiaicol   | +     | 5.09 ± 0.63a                                    | 6.94 ± 0.5a      | 6.17 ± 0.4a      | 8.64 ± 1.63a    | ns    | ***       | *             |

**Notes:** <sup>(1)</sup> Mean VP concentrations ( $n = 4$ ) are recorded in ng/g ± the standard error of the mean (SEM). <sup>(2)</sup> The effects of smoke (S), biofilm treatments (T) and S x T interaction were tested with a two-way ANOVA; \*, \*\*, \*\*\* and \*\*\*\* denote significant differences of  $p \leq 0.05$ ,  $p \leq 0.01$ ,  $p \leq 0.001$  and  $p \leq 0.0001$ , respectively; ns = not significant ( $P \geq 0.05$ ). Different letters (within the rows) indicate the differences in effects of time of biofilm application on the smoked sample only using one-way ANOVA followed by a Tukey's HSD test. Blank cells denote concentrations below the method limit of detection.

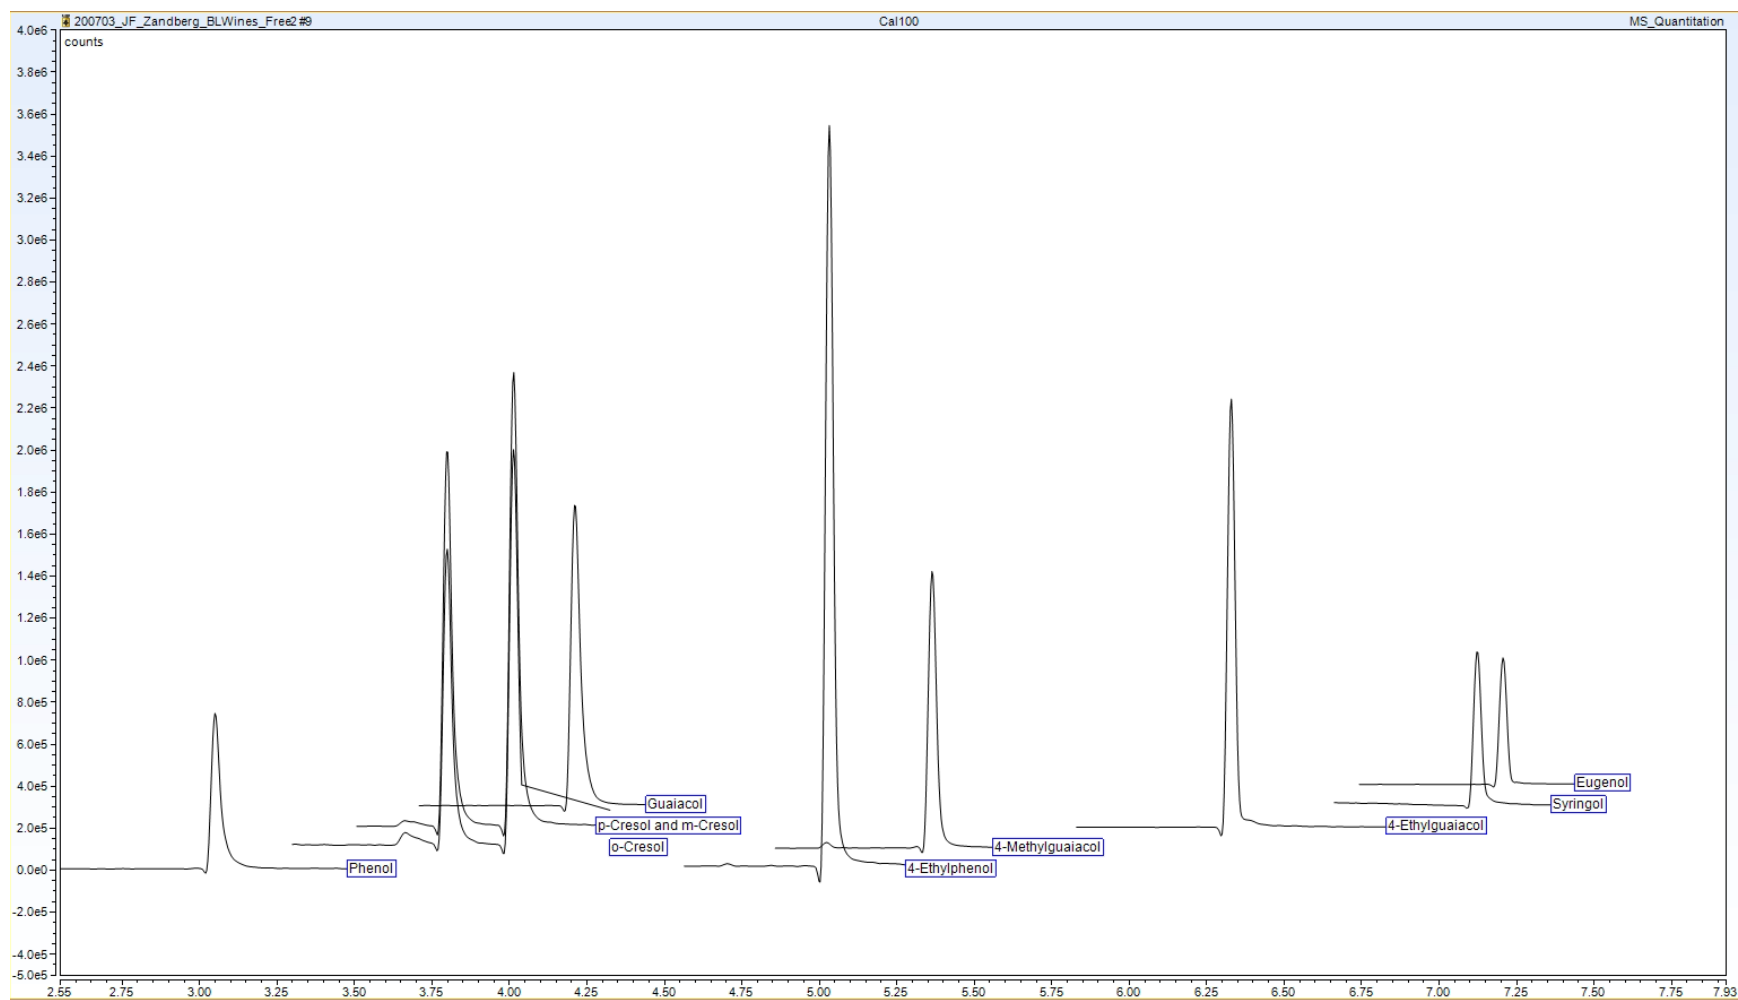

Figure S1. Extracted ion chromatograms for all VPs quantitated.
